# Supplementary material
Source: Research Square preprint supplement (doi:10.21203/rs.3.rs-8819009/v1)
Supplement: Supplementary file 1 [file 20d457840d183c52b4636c07.docx]

To explore potential non-linear threshold effects of lipid levels on economic burden, we conducted a sensitivity analysis. We categorized Triglycerides (TG) into three groups based on clinical cutoffs (<11.3, 11.3-22.6, >22.6 mmol/L) and Total Cholesterol (TC) into four groups based on sample quartiles. We analyzed their association with Length of Stay (LOS) using negative binomial regression and with Total Hospitalization Cost (THC) using Gamma regression. The results are presented below.

Table S1. Association of Categorized Triglyceride (TG) and Total Cholesterol (TC) Levels with Length of Stay (LOS) and Total Hospitalization Cost (THC)

| **Outcome Variable** | **Predictor Variable** | **IRR / RR¹** | **95% Confidence Interval (95% CI)** | **P** |
| --- | --- | --- | --- | --- |
| **Length of Stay (LOS)** |  | **IRR** |  |  |
| *(Model: Negative Binomial)* | **TG Group (Ref: <11.3)** |  |  |  |
|  | Medium TG (11.3-22.6) | 0.963 | 0.779 – 1.189 | 0.723 |
|  | High TG (>22.6) | 0.962 | 0.687 – 1.348 | 0.822 |
|  | **TC Group (Ref: Q1)** |  |  |  |
|  | Q2 | 0.855 | 0.655 – 1.117 | 0.251 |
|  | Q3 | 0.819 | 0.622 – 1.077 | 0.150 |
|  | Q4 | 0.863 | 0.656 – 1.134 | 0.286 |
|  |  |  |  |  |
| **Total Hospitalization Cost (THC)** |  | **RR** |  |  |
| *(Model: Gamma Regression)* | **TG Group (Ref: <11.3)** |  |  |  |
|  | Medium TG (11.3-22.6) | 0.975 | 0.812 – 1.171 | 0.791 |
|  | High TG (>22.6) | 0.917 | 0.683 – 1.231 | 0.562 |
|  | **TC Group (Ref: Q1)** |  |  |  |
|  | Q2 | 1.176 | 0.925 – 1.496 | 0.183 |
|  | Q3 | 1.074 | 0.842 – 1.370 | 0.561 |
|  | Q4 | 1.188 | 0.932 – 1.515 | 0.164 |

Notes: ¹ IRR (Incidence Rate Ratio) is reported for the Length of Stay model; RR (Rate Ratio) is reported for the Total Hospitalization Cost model. TG categories: Low (<11.3 mmol/L), Medium (11.3-22.6 mmol/L), High (>22.6 mmol/L). TC categories: Based on sample quartiles (Q1, Q2, Q3, Q4). All P-values were > 0.05, indicating no statistically significant differences between the categorized groups and their respective reference groups in these models.
